# Supplementary material for: Influence of Sexual Dimorphism, Aging, and Differential Cell Capture Efficiency of Blood Separation Systems on the Quality of Platelet-Rich Plasma
Source: MDPI journal article supplement (doi:10.3390/jcm11061683), 2022-03-18
Supplement: s1 [file s1]

## Influence of Sexual Dimorphism, Aging, and Differential Cell Capture Efficiency of Blood Separation Systems on the Quality of Platelet-Rich Plasma

Figure S1. Blood cell count in WB and final products concentrated by the Easy kit system: (a) platelets; (b) WBCs (as a whole), neutrophils, lymphocytes, and monocytes.

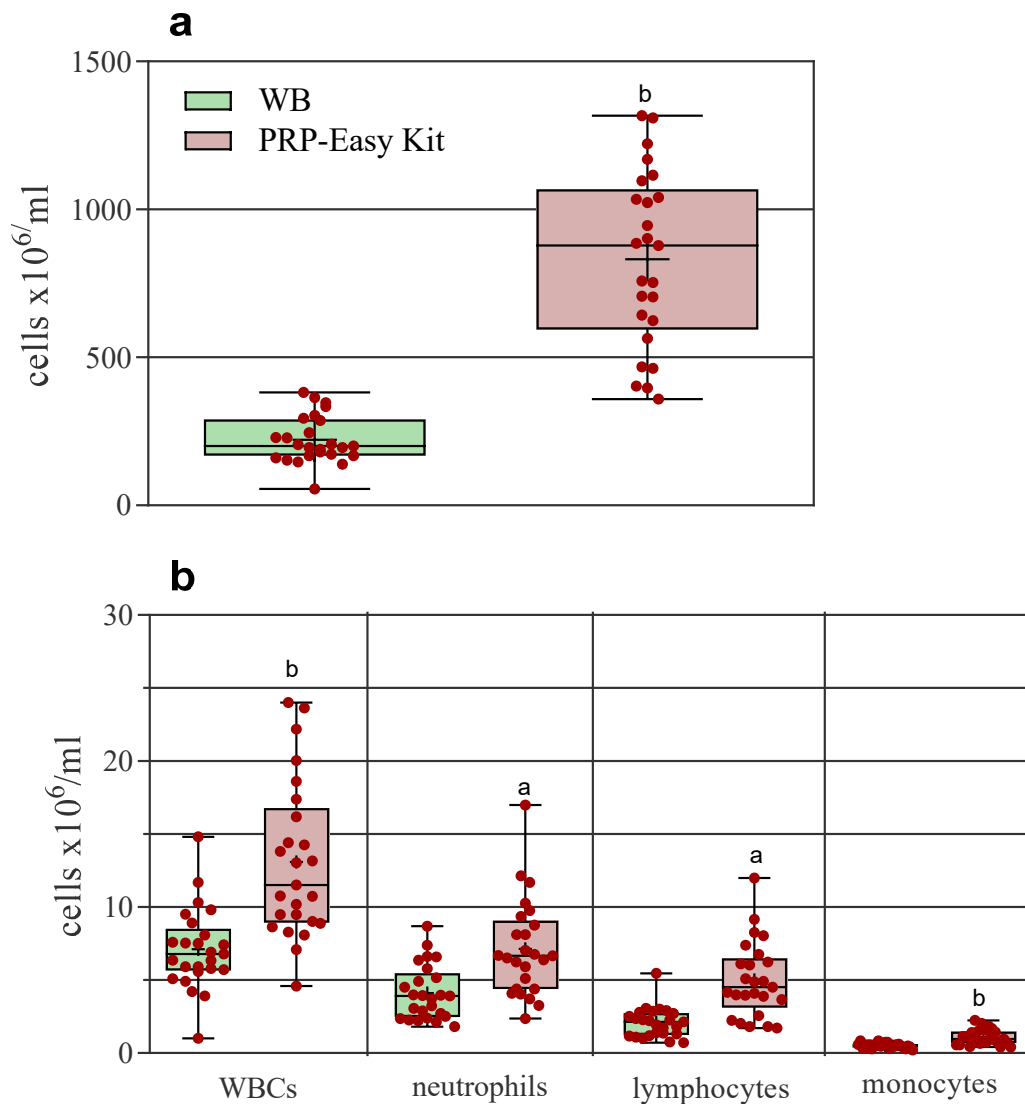

Median, line in the middle of the IQR box; mean, +; whiskers, minimum to maximum.

<sup>a</sup>  $P \leq 0.002$  (U test). <sup>b</sup>  $P < 0.001$  (independent *t*-test) for WB vs. PRP products.

Table S1. Descriptive data of the sample population by sex.

|                          | Male Group<br>n=13                   |                   | Female Group<br>n= 13                 |                   | <i>P-value</i>      |
|--------------------------|--------------------------------------|-------------------|---------------------------------------|-------------------|---------------------|
|                          | Mean $\pm$ SD<br>(range)             | Median<br>(IQR)   | Mean $\pm$ SD<br>(range)              | Median<br>(IQR)   |                     |
| Age (years)              | 62.09 $\pm$ 24.30<br>(29.00-92.00)   | 64.00<br>[48.00]  | 62.50 $\pm$ 23.65<br>(31.00– 93.00)   | 70.00<br>[49.75]  | 0.826 <sup>a</sup>  |
| Weight (Kg)              | 75.36 $\pm$ 17.29<br>(51.00-113.00)  | 76.00<br>[22.00]  | 69.21 $\pm$ 15.51<br>(52.00 – 103.00) | 68.00<br>[23.75]  | 0.359 <sup>b</sup>  |
| Height (cm)              | 176.80 $\pm$ 9.12<br>(166.00-193.00) | 174.00<br>[14.00] | 163.6 $\pm$ 6.23<br>(152.00- 174.00)  | 164.50<br>[10.30] | <0.001 <sup>b</sup> |
| BMI (Kg/m <sup>2</sup> ) | 24.11 $\pm$ 5.31<br>(17.75-34.11)    | 22.22<br>[8.00]   | 25.76 $\pm$ 5.05<br>(18.34- 34.58)    | 24.95<br>[7.66]   | 0.436 <sup>b</sup>  |

**Abbreviations:** BMI, body mass index; SD: standard deviation; range (min–max); IQR: interquartile range; <sup>a</sup> Mann–Whitney U test; <sup>b</sup> independent *t*-test. A value of  $p < 0.05$  (with a 95% confidence interval) was considered statistically significant.

Figure S2. PRP/WB ratio relationships with blood cell density ((a) platelets and WBCs; (b) neutrophils, lymphocytes, and monocytes) and (c) with CLR (neutrophils, lymphocytes, or monocytes/WBC ratio).

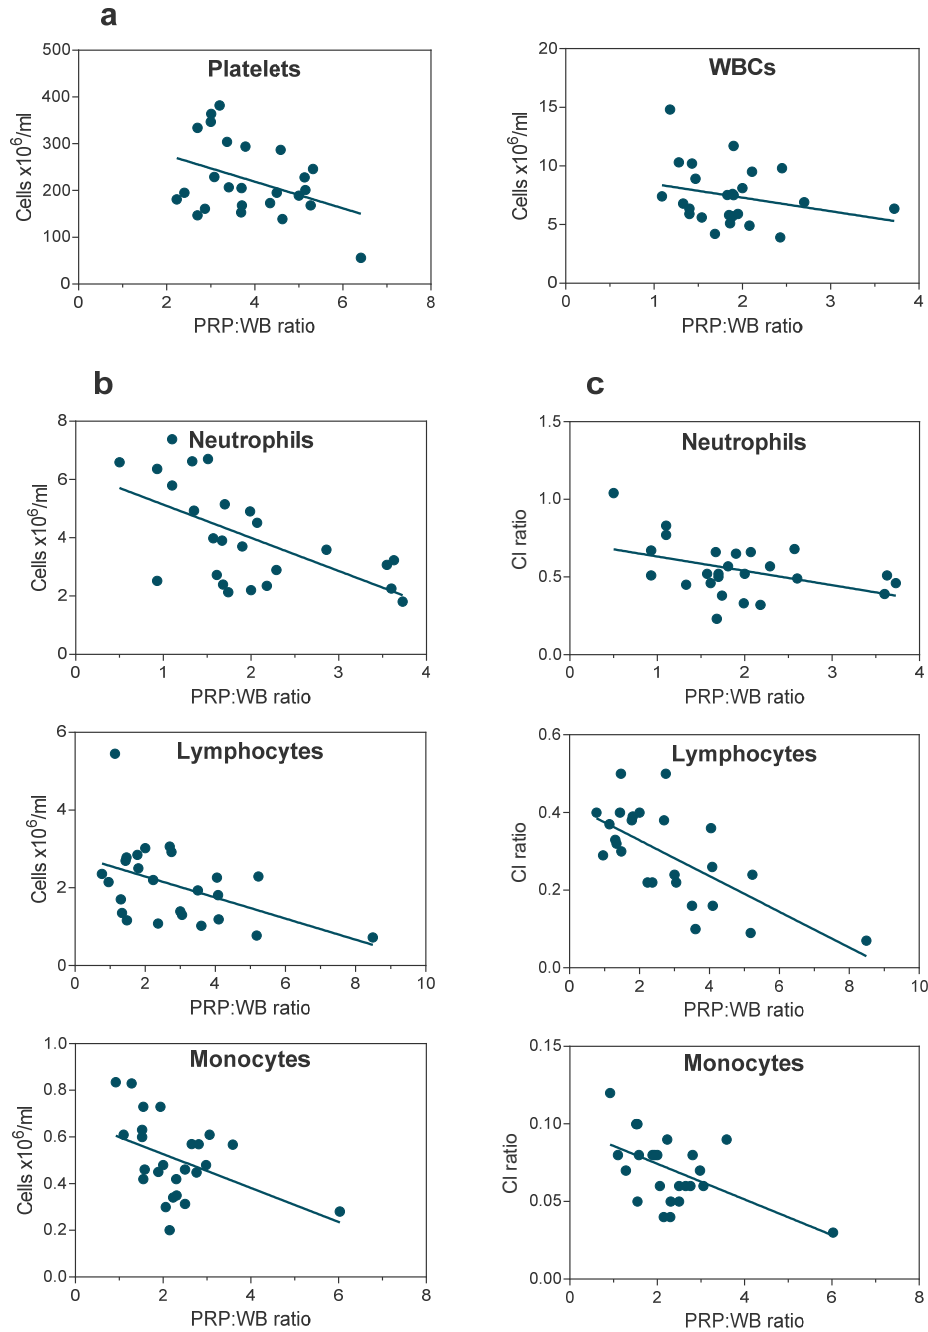

A: platelets,  $y=333.00-28.50x$ ; WBCs,  $y=9.62-1.16x$ .

B: neutrophils,  $y=6.27-1.14x$ ; lymphocytes,  $y=2.83-0.27x$ ; monocytes,  $y=0.67-0.07x$ .

C: neutrophils,  $y=0.72-0.09x$ ; lymphocytes,  $y=0.42-0.05x$ ; monocytes,  $y=0.09-0.01x$ .

According to the linear equation  $y=y_{\text{intercept}} + \text{slope} \times x$ , where  $y$  is the density or the CL ratio, intercept is the Y value where the line intersects the Y axis, slope is the slope of the line, and  $x$  is the PRP/WB ratio.
